# Supplementary material for: Neuropilin-1 functions as a VEGFR2 co-receptor to guide developmental angiogenesis independent of ligand binding
Source: eLife journal article supplement (doi:10.7554/elife.03720), 2014-09-22
Supplement: supp [file elife-03720-supp-v1.zip]

| The primers used for generating the D320K expression construct are as follows:         |                                            |                             |
|----------------------------------------------------------------------------------------|--------------------------------------------|-----------------------------|
| Primer name                                                                            | Primer sequence                            |                             |
| outside fw                                                                             | 5'-CCGGCTGGAGATCTGGGATGGATT-3'             |                             |
| outside rev                                                                            | 5'-CTGGTCACCAGGCGGATGTTTTCTG-3'            |                             |
| middle fw                                                                              | 5'-TGGACACCAGGAGAGA <b>A</b> GCCTACAG-3'   | mutated<br>bases in<br>bold |
| middle rev                                                                             | 5'-CTGTAGGACT <b>T</b> CTCTCCTGGTGTCCA-3'  | mutated<br>bases in<br>bold |
| The following primers were used to amplify the short arm and clone it into the vector: |                                            |                             |
| Primer name                                                                            | Primer sequence                            |                             |
| 5' primer                                                                              | atg <b>gaattc</b> TCATGGAAGAGAAGATGTGGC    | EcoRI site added in bold    |
| 3' primer                                                                              | atg <b>gtaac</b> GTATGTAGGGAGTTGAAGGGCATC  | HpaI site added in bold     |
| The primers used to amplify these homology arms are as follows:                        |                                            |                             |
| Primer name                                                                            | Primer sequence                            |                             |
| 5' homology arm<br>primer #1                                                           | atg <b>ggggcgcg</b> CTACTTTTGCTCATGAAGCCAT | NotI site added in bold     |
| 5' homology arm<br>primer #2                                                           | atg <b>gtcgac</b> TGCAGAAATTCTGTCTATAGTG   | SalI site added in bold     |
| 3' homology arm<br>primer #1                                                           | atc <b>gtcgac</b> GCCTGGATTTCTTCTGCAAGT    | SalI site added in bold     |
| 3' homology arm<br>primer #2                                                           | atc <b>ctcgag</b> ATGGGGTGGTAGGGCAGGGG     | XhoI site added in bold     |
| The D320K mutation was introduced using PCR with the following primers:                |                                            |                             |

| Primer name                                    |                                | Primer sequence                                       |                  |
|------------------------------------------------|--------------------------------|-------------------------------------------------------|------------------|
| 5' outside primer endogenous BglII site        |                                | GGATCAAATGCAGATCTTAATAC                               |                  |
| 3' outside primer endogenous BstEII site       |                                | TACACAAAGATCTCAAACACACA                               |                  |
| 5' mutation primer                             |                                | GACTCCAGGAGAAA <b>AG</b> TCCTACAA                     | mismatch in bold |
| 3' mutation primer                             |                                | TTGTAGGACT <b>TTT</b> CTCCTGGAGTC                     | mismatch in bold |
| NpnI <sup>VEGF-</sup> mice genotyping primers: |                                |                                                       |                  |
| Primer name                                    |                                | Primer sequence                                       |                  |
| fw                                             | 5'-TACAAAAGTGGCTTAAGGGAGA-3'   | wild-type band is 305 bp<br>targeted allele is 350 bp |                  |
| rev                                            | 5'-GATTGCCAGTGTGATAGGATT-3'    |                                                       |                  |
| Mutation site sequencing primers:              |                                |                                                       |                  |
| Primer name                                    |                                | Primer sequence                                       |                  |
|                                                | 5'-GGATCAAATGCAGATCTTAATAC -3' |                                                       |                  |
|                                                | 5'-TACACAAAGATCTCAAACACACA-3'  |                                                       |                  |
